# Supplementary material for: Characterization of the TCR β Chain CDR3 Repertoire in Subarachnoid Hemorrhage Patients with Delayed Cerebral Ischemia
Source: PubMed Central journal article supplement (PMC7246515; doi:10.3390/ijms21093149), 2020-04-29
Supplement: ijms-21-03149-s001.pdf [file ijms-21-03149-s001.pdf]

## Supplementary data

**Figure 1.** TCRB CDR3 clonotypes on the day of admission and DCI are represented as dots and are ranked based on their frequency, from high to low [12].

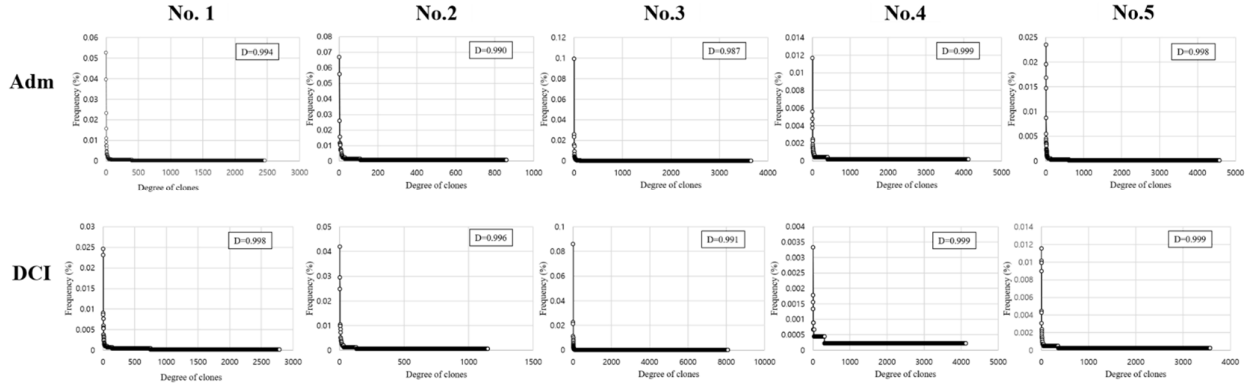

**Figure 2.** Overlapping sequences of the TCRB CDR3 amino acid in the two different time period of admission and DCI in each patients. The distribution of the top 5 common overlapped amino acid sequences is presented on the right side.

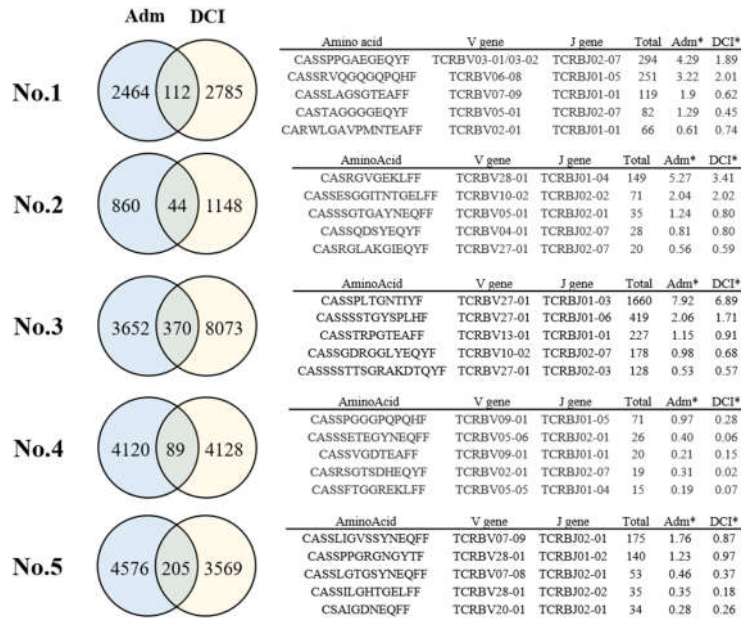

**Table.** Comparison of the clonotype abundance distribution in each patient between the day of admission (Adm) and delayed cerebral ischemia (DCI).

| Read frequency (%)    | No. 1 |      | No. 2 |      | No. 3 |      | No. 4 |      | No. 5 |      |
|-----------------------|-------|------|-------|------|-------|------|-------|------|-------|------|
|                       | Adm   | DCI  | Adm   | DCI  | Adm   | DCI  | Adm   | DCI  | Adm   | DCI  |
| $\geq 5$              | 1     | 0    | 0     | 0    | 1     | 1    | 0     | 0    | 0     | 0    |
| $0.5 \leq - < 5$      | 8     | 8    | 2     | 0    | 8     | 7    | 2     | 0    | 6     | 4    |
| $0.05 \leq - < 0.5$   | 391   | 136  | 10    | 9    | 119   | 60   | 54    | 27   | 60    | 43   |
| $0.005 \leq - < 0.05$ | 2064  | 2641 | 848   | 1139 | 3524  | 8005 | 4064  | 4101 | 4510  | 3522 |
| Total                 | 2464  | 2785 | 860   | 1148 | 3652  | 8073 | 4120  | 4128 | 4576  | 3569 |
